# Supplementary material for: GC/MS Analysis, Antioxidant Activity, and Antimicrobial Effect of Pelargonium peltatum (Geraniaceae)
Source: MDPI journal article supplement (doi:10.3390/molecules27113436), 2022-05-26
Supplement: s1 [file s1]

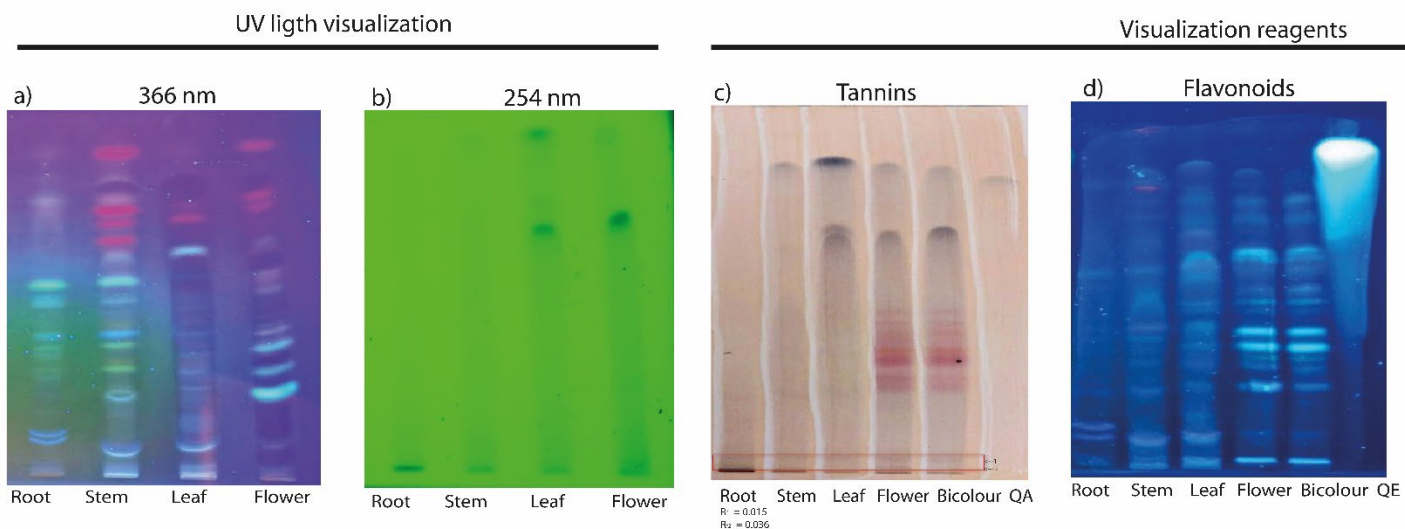

**Figure S1. Thin layer chromatography of Different freeze-dried extracts from *P. peltatum*.** A) TLC visualize by UV light at 366 nm, B) TLC visualize by UV light at 254 nm, C) Tannins revealed by 1%, Ferric chloride D) Flavonoids revealed by 1 % of Aluminum chloride, and E) Reducing Sugars revealed by trichloroacetic acid.

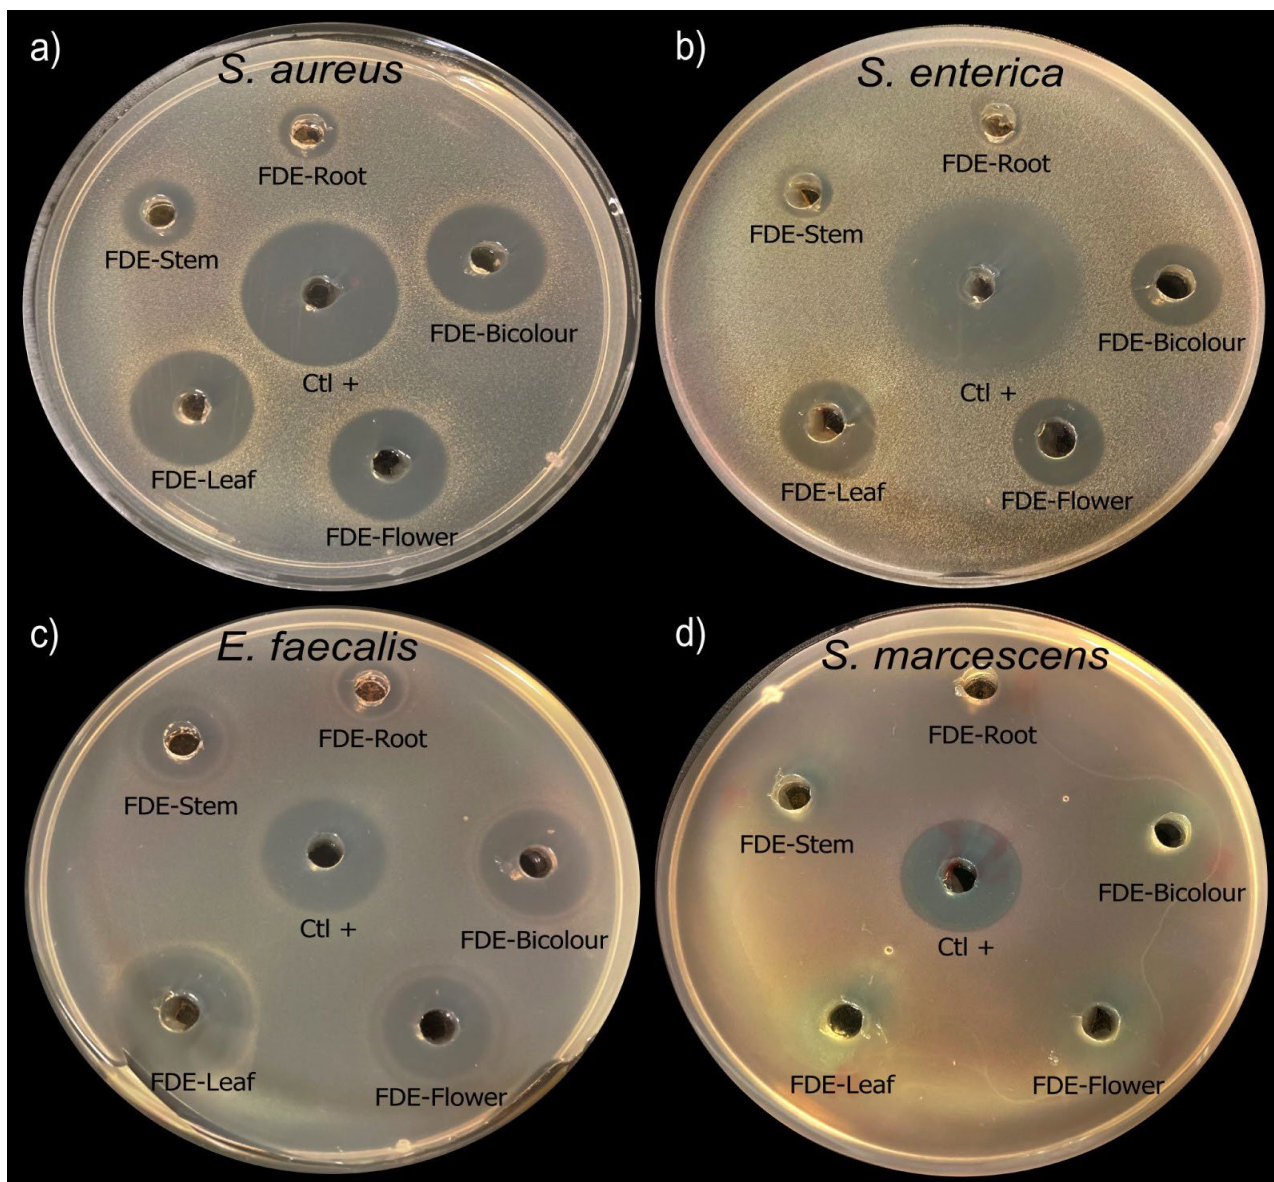

**Figure S2.** Evaluation of the antimicrobial activity of *P. peltatum* FDE against : a) *S. aureus*, b) *S. enterica*, c) *E. faecalis* and d) *S. marcescens*. Ctl+: Kanamycin positive control.

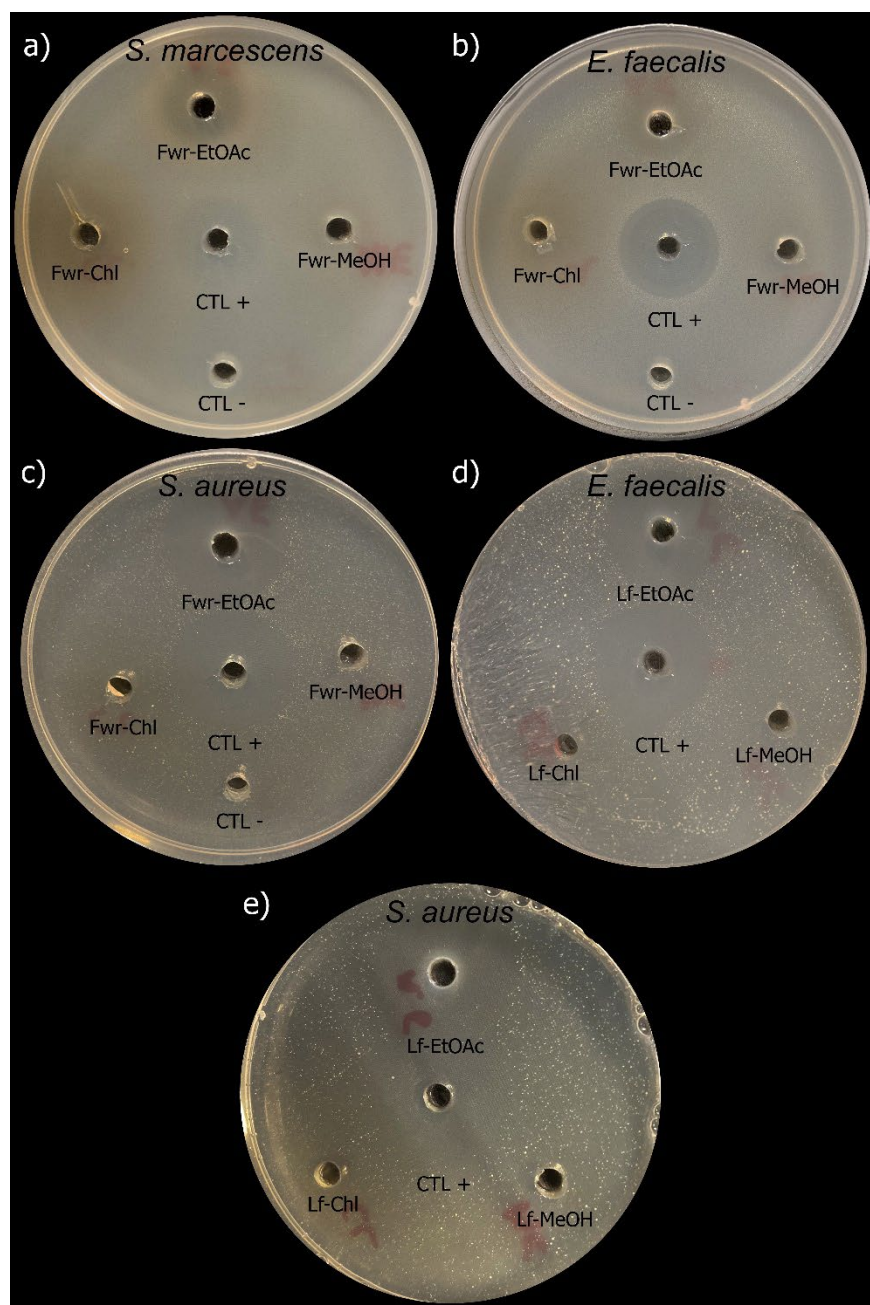

**Figure S3.** Evaluation of the antimicrobial activity of FDE-flowers and FDE-Leaf fractions against a) *S. marcescens*, b) *E. faecalis*, c) *S. aureus*, d) *E. faecalis* and e) *S. aureus*. Ctl+: Kanamycin positive control. Ctl -: LB with 2% of DMSO. Fractions were resuspended in sterile LB with 2% of DMSO.

**Table S1.** Solubility of *P. peltatum* freeze-dried extracts.

| Polarity  | Solvent         | FDE-Root | FDE-Stem | FDE-Leaf | FDE-Flower |
|-----------|-----------------|----------|----------|----------|------------|
| Polar     | Water           | ++       | ++       | +        | ++         |
|           | Ethanol 96%     | -        | +        | +        | +          |
|           | Ethanol 70%     | ++       | ++       | ++       | +          |
|           | Methanol        | ++       | ++       | ++       | +          |
|           | Chloroform      | +        | +        | +        | -          |
| Non polar | Dichloromethane | +        | +        | -        | -          |
|           | Ethyl acetate   | -        | +        | -        | -          |
|           | Hexane          | -        | -        | -        | -          |
|           | Diethyl ether   | -        | +        | +        | -          |
|           |                 |          |          |          |            |

( - ) Non soluble; ( + ) Soluble; ( ++ ) Very soluble

**Table S2.** Inhibition zone growth (mm) of FDEs against different strains

| Strain                | FDE-Root<br>(mm)          | FDE-Stem<br>(mm)           | FDE-Leaf<br>(mm)          | FDE-<br>Flower<br>(mm)   | FDE-Bicolor<br>(mm) | Control +<br>(mm) |
|-----------------------|---------------------------|----------------------------|---------------------------|--------------------------|---------------------|-------------------|
| <i>S. aureus</i>      | 9.89 ± 0.30<br><b>abc</b> | 12.15 ± 0.67<br><b>def</b> | 22.15 ± 0.71 <b>g</b>     | 20.33 ± 0.75             | 19.67 ± 0.53        | 26.19 ± 0.72      |
| <i>S. enterica</i>    | 7.57 ± 1.48 <b>ac</b>     | 8.85 ± 0.79<br><b>d</b>    | 12.29 ± 1.07 <b>h</b>     | 12.36 ± 1.04             | 10.76 ± 1.44        | 26.57 ± 0.92      |
| <i>E. faecalis</i>    | 11.3 ± 0.27<br><b>abc</b> | 14.33 ±<br>0.79 <b>d</b>   | 22.41 ± 1.31<br><b>gh</b> | 18.41 ±<br>0.96          | 18.78 ± 1.43        | 20.93 ± 1.28      |
| <i>S. marcescens.</i> | 9.60 ± 0.47<br><b>abc</b> | 11.01 ± 0.34<br><b>de</b>  | 15.83 ± 0.50<br><b>g</b>  | 16.01 ± 0.44<br><b>i</b> | 16.40 ± 0.39        | 19.86 ± 0.36      |

Plus/minus values are means ± S.D.

† p-values for differences among the five extracts were calculated by analysis of variance. When the difference among the regions was significant ( $p < 0.05$ ), all pairwise comparisons tested for significance with the Tukey's Honest Significant Difference test (TukeyHSD) procedure.

‡ The value for the variable in FDE-Root is significantly different from the value in FDE-Stem ( $p < 0.001$ ).

**a** The value for the variable in FDE-Root is significantly different from the value in FDE-Leaf ( $p < 0.001$ ).

**b** The value for the variable in FDE-Root is significantly different from the value in FDE-Flower ( $p < 0.001$ ).

**c** The value for the variable in FDE-Root is significantly different from the value in FDE-Bicolor ( $p < 0.001$ ).

**d** The value for the variable in FDE-Stem is significantly different from the value in FDE-Leaf ( $p < 0.001$ ).

**e** The value for the variable in FDE-Stem is significantly different from the value in FDE-Flower ( $p < 0.001$ ).

**f** The value for the variable in FDE-Stem is significantly different from the value in FDE-Bicolor ( $p < 0.001$ ).

**h** The value for the variable in FDE-Leaf is significantly different from the value in FDE-Flower ( $p < 0.05$ ).

**g** The value for the variable in FDE-Leaf is significantly different from the value in FDE-Bicolor ( $p < 0.05$ ).

**i** The value for the variable in FDE-Flower is significantly different from the value in FDE-Bicolor ( $p < 0.05$ ).

FDE, Freeze-Dried Extract; mm, millimeters
